# Supplementary material
Source: PubMed Central journal article supplement (PMC6936709)

1 **A cis-element within the ARF locus mediates repression of p16<sup>INK4A</sup> expression**  
2 **via long-range chromatin interactions**

3  
4 Yang Zhang<sup>a,1</sup>, Judith Hyle<sup>a,1</sup>, Shaela Wright<sup>a,1</sup>, Ying Shao<sup>b</sup>, Xujie Zhao<sup>c</sup>, Hui Zhang<sup>d</sup> and  
5 Chunliang Li<sup>a,\*</sup>

6  
7 <sup>a</sup>Department of Tumor Cell Biology, St. Jude Children's Research Hospital, 262 Danny  
8 Thomas Place, Memphis, TN 38105, USA

9 <sup>b</sup>Department of Computational Biology, St. Jude Children's Research Hospital, 262  
10 Danny Thomas Place, Memphis, TN 38105, USA

11 <sup>c</sup>Department of Pharmaceutical Sciences, St. Jude Children's Research Hospital, 262  
12 Danny Thomas Place, Memphis, TN 38105, USA

13 <sup>d</sup>Department of Hematology and Oncology, Guangzhou Women and Children's Medical  
14 Center, Guangzhou Medical University, 9 Jinsui Road, Guangzhou, Guangdong 510623,  
15 People's Republic of China.

16  
17 <sup>1</sup>These authors contributed equally to this study.

18 <sup>\*</sup>To whom correspondence should be addressed. Chunliang Li, PhD. Department of  
19 Tumor Cell Biology, St. Jude Children's Research Hospital, 262 Danny Thomas Place,  
20 Memphis, TN 38105, USA. Email: [chunliang.li@stjude.org](mailto:chunliang.li@stjude.org); Telephone: 1-901-595-6530.

## 24 **METHODS and MATERIALS**

25

### 26 **Cell culture**

27 SEM cells (ACC-546, DSMZ) and SK-N-SH cells (HTB11, ATCC) were maintained in  
28 RPMI-1640 medium (Hyclone) containing 10% fetal bovine serum (FBS) (HyClone), 2  
29 mM glutamine (Sigma), and 1% penicillin/streptomycin (Thermo Fisher Scientific). All  
30 cells were maintained at 37°C in a 5% CO<sub>2</sub> atmosphere and 95% humidity. All cells used  
31 in this study were mycoplasma free. Cell identity was confirmed by STR analysis.

32

### 33 **Vector construction**

34 All target-specific sgRNAs were predicted using online software (<http://crispr.mit.edu/>).  
35 Oligomers containing 20-bp of the selected target sequence were synthesized by Thermo  
36 Fisher Scientific and cloned into the all-in-one vector (1) between BsmBI sites. All  
37 oligomer information is listed in *SI Appendix*, Dataset S1. Correct clones were screened  
38 and confirmed by Sanger sequencing with the U6-Forward sequencing primer. A two-  
39 step cloning protocol was used to generate the long-HA donor vector. Primers were  
40 designed to amplify the 800-bp 5' HA flanking the endogenous sgRNA target. Overhangs  
41 of 23-bp, including the target sgRNA and PAM sequences, were included on the 5' end  
42 of the HA sequence. The 3' HA was generated according to a similar design but included  
43 an additional overhang for in-fusion cloning. The HAs were amplified from SEM cell  
44 genomic DNA. The *P2A-mCherry* DNA fragment was amplified from pEGFP-C1  
45 (Clontech). SnapGene software (SnapGene) was used to design all primers used for in-  
46 fusion cloning (Clontech). The PCR reactions were performed using CloneAmp

47 polymerase (Clontech), and the cycling parameters were as follows for all cloning: 98°C  
48 for 2 min, followed by 98°C for 15 s, 55°C for 20 s, and 72°C for 20 s for 40 cycles. First,  
49 the amplified 5' HA for knock-in was cloned into pBluescript-SK by using the TA Cloning  
50 Kit (Thermo Fisher Scientific). The DNA was purified from colonies and screened by  
51 Sanger sequencing with the primers M13F and M13R. The pBluescript-SK-sgRNA-  
52 PAM-5' HA was then linearized and ligated with *P2A-mCherry* and the 3' HA-sgRNA-  
53 PAM through in-fusion cloning (Clontech). Sanger sequencing was performed to ensure  
54 that the knock-in DNA was cloned in-frame with the HAs. The Lenti-dCas9-KRAB-Blast  
55 plasmid (#89567) and the LentiGuide-Puro plasmid (#52963) were purchased from  
56 Addgene. The primer sequences used for cloning and sequencing are listed in *S/*  
57 *Appendix*, Dataset S1.

58

### 59 **Establishment of a *p16<sup>INK4A</sup>-P2A-Cherry* reporter cell line**

60 SEM were electroporated by using the Nucleofector-2b device (Lonza) with the V-kit and  
61 program X-001. For *p16<sup>INK4A</sup>-P2A-Cherry* knock-in delivery, 2.5 µg of the donor plasmid and  
62 2.5 µg of the CRISPR/Cas9-p16<sup>INK4A</sup>-C-terminus-gRNA all-in-one plasmid were used for  
63 5 million SEM cells. Twenty-four hours after transfection, cells were sorted for the  
64 CRISPR/Cas9-p16<sup>INK4A</sup>-C-terminus-gRNA vector GFP fluorescent marker to enrich the  
65 transfected cell population. After sorted cells recovered in culture for up to 3 weeks, a  
66 second sort was performed to select cells for successful knock-in by sorting for cells  
67 expressing the knockin mCherry fluorescent marker. Two weeks later, a third sort was  
68 repeated for the mCherry fluorescent marker. Single-cell derived colonies were picked up  
69 and expanded for further characterization.

70

### 71 **Characterization of successful knock-in events by PCR and Sanger Sequencing**

72 DNA from single-cell derived colonies was extracted with a PureLink Genomic DNA Mini  
73 Kit (Thermo Fisher Scientific). Combinatorial primer sets designed to recognize the 5' and  
74 3' knock-in boundaries were used with the following PCR cycling conditions: 98°C for 2  
75 mins, followed by 40 cycles of 98°C for 15 s, 55°C for 20 s, and 72°C for 20 s. The bands  
76 shown at the expected size in electrophoresis were cut out, purified, and ligated to the  
77 pCR-Blunt II-TOPO vector (Thermo Fisher Scientific) for Sanger sequencing with the  
78 M13F and M13R primers. Heterozygous knockin clones carrying both wildtype allele and  
79 the *p16<sup>INK4A-P2A-mCherry</sup>* knockin allele were selected for following functional  
80 characterization.

81

### 82 **CRISPR library construction and screening**

83 A set of 2,029-sgRNA oligos that target on H3K27ac and ATAC-seq positive peaks  
84 defined in the TAD containing *INK4/ARF* in IMR90, HCT116 and SEM cells as well as an  
85 additional 20 non-targeting control sgRNAs with no detectable match to the human  
86 genome were designed for array-based oligonucleotide synthesis (CustomArray). Unique  
87 binding of each sgRNA was verified by sequence blast against the whole human genome.  
88 To construct a sgRNA pooled library targeting on human TFs, seven gRNAs against each  
89 of the 1,639 human TFs were obtained from validated sgRNA libraries published  
90 previously (2-10). For each library, the synthesized oligo pool was amplified by PCR and  
91 cloned into LentiGuide-Puro backbone (#52963) by in-fusion assembly (Clontech). The  
92 *p16<sup>INK4A-P2A-mCherry</sup>* reporter cell line was overexpressed with lentiviral Cas9 or dCas9-

93 KRAB followed with infection of pooled sgRNA library at low M.O.I (~0.3). Infected cells  
94 were selected by blasticidine and puromycin and sorted for mCherry<sup>High</sup> and mCherry<sup>Low</sup>  
95 populations. The sgRNA sequences were recovered by genomic PCR and Deep  
96 Sequencing using MiSeq for single-end 150-bp (Illumina). The primer sequences used  
97 for cloning and sequencing are listed in *SI Appendix*, Dataset S1. The sgRNA sequences  
98 are described in *SI Appendix*, Datasets S2 and S3. High-titer lentivirus stocks were  
99 generated in 293T cells as previously described (1).

100

### 101 **Data analysis of CRISPR screening**

102 The raw FASTQ data were de-barcoded and mapped to the original reference sgRNA  
103 library. The differentially enriched sgRNAs were defined by comparing normalized counts  
104 between sorted cells of top 10% and bottom 10% of mCherry-expressing bulk populations.  
105 At least three independent replicate screenings were performed with reporter cell lines  
106 stably expressing Cas9, dCas9-KRAB and no effector control. Normalized counts for  
107 each sgRNA were extracted and used for identifying differentially enriched sgRNA by  
108 DESeq2 (11). The combined analysis of seven sgRNAs against each human TF was  
109 conducted by MAGeCK algorithm (12). Detailed screening results were included in *SI*  
110 *Appendix*, Datasets S2 and S3.

111

### 112 **Flow cytometry**

113 Suspension cultured SEM were collected by centrifugation at 800Xg, filtered through a  
114 70-µm filter, and analyzed for mCherry on a BD FACS Aria III flow cytometer with a

115 negative control. The 4,6-diamidino-2-phenylindole (DAPI) staining was conducted prior  
116 to sort to exclude dead cells.

117

## 118 **Capture-C**

119 Next-generation Capture-C was performed essentially as described by others (13). In  
120 brief, about  $1 \times 10^7$  cells were collected per Capture-C reaction. Cells were freshly fixed in  
121 1% formaldehyde for 10 mins at room temperature by rotation then quenched by 0.125  
122 M glycine followed by resuspension in 5 ml lysis buffer and incubated on ice for 20 mins.  
123 The pellets were re-suspended in 1 mL of 1X DpnII buffer and transferred to a 2 mL tube  
124 for homogenization followed with centrifugation at 14,000 rpm for 5 mins at 4°C. The  
125 supernatant was removed and discarded. The remaining pellets underwent digestion,  
126 ligation, and de-crosslinking. After de-crosslinking and DNA precipitation, a small portion  
127 of DNA was run on a gel to check for digestion and ligation efficiency. Once the 3C library  
128 construction was complete, 5-6 µg of the 3C DNA library was sheared ~200-bp followed  
129 with end-repair, adaptor ligation, and PCR enrichment of adaptor ligated DNA. Two  
130 rounds of captures were conducted using 1.5-2 µg of DNA, 5 µg COT DNA, and 1 µl xGen  
131 Universal Blocking Oligo i7 and 1 µl xGen Universal Blocking Oligo i5 in a 1.5 mL tube.  
132 Samples were transferred to thermal cycler at 47 °C for 72 hours for the first capture and  
133 16-20 hours for the second capture. The constructed library was sequenced using the  
134 Illumina MiSeq System for paired-end 150-bp. The paired-end reads were reconstructed  
135 into single reads with FLASH, digested in silico with the DpnII2E.pl script, and aligned to  
136 the human genome using Bowtie 1.0.0 (<http://bowtie-bio.sourceforge.net/index.shtml>).  
137 Interaction frequencies were determined using CCanalyser2.pl

138 (<https://github.com/telenius/captureC/releases>). To quantify interaction frequency  
139 between bait sequence and target regions, signal value from .bw file was analyzed by  
140 “bigWigToBedGraph”, and then normalized by probe signal for each experiment (14).

141

## 142 **CUT&RUN assay**

143 Three million cells were collected for each sample. Cells were pelleted at 600Xg for 3  
144 mins at room temperature. Cell pellets were washed twice with 1.5 ml room temperature  
145 wash buffer. Cell pellets were resuspended in 1 ml wash buffer at room temperature.  
146 While gently mixing, 100 µl concanavalin beads (BioMagAPlus Concanavalin A,  
147 Polysciences, 86057-3; prewashed and resuspended in 100 µl binding buffer) were  
148 added to the samples, followed with gentle rotation for 10 mins at room temperature.  
149 Samples were placed on a magnetic stand and the supernatant was removed. Beads  
150 were resuspended in 200 µl AB buffer (Dig-wash buffer with 0.02% digitonin and 0.5 M  
151 EDTA) with either ZNF217 antibody (Thermo Fisher Scientific, 720352), Cas9 antibody  
152 (Clontech, 632606) or YY1 antibody (Active Motif, 61779). Samples were rotated at 4 °C  
153 for 2 hours. Samples were placed on a magnetic stand and supernatant was removed.  
154 Beads were gently resuspended in 200 µl Dig-wash buffer with 0.02% digitonin and 2 µl  
155 PA-MN (home-made reagent kindly provided by Dr. Steven Henikoff), followed by rotation  
156 at 4 °C for 1 hour. Samples were placed on a magnetic stand and supernatant removed.  
157 Beads were washed for a total of three times in 1 ml Dig-wash buffer, pipetting gently.  
158 Following the final wash, beads were resuspended in 100 µl Dig-wash buffer by gentle  
159 mixing and transferred to a new tube. On ice, 2 µl 100 mM CaCl<sub>2</sub> was added to the sample  
160 with gentle mixing. Samples were incubated on ice for 30 mins. Stop buffer (100 µl) was

161 added to the samples and samples were incubated for 10 mins at 37 °C followed by  
162 centrifugation at 4 °C, 12,000 rpm. Samples were placed on a magnetic stand and the  
163 supernatant containing the cut and run fragments was collected. To the samples, 2 µl  
164 10% SDS and 2.5 µl proteinase K were added and the samples were incubated at 50 °C  
165 overnight. DNA was extracted by phenol/chloroform/isopropanol protocol. Library  
166 construction was performed using the NEBNext Ultrall DNA Library Prep Kit from NEB  
167 (E7645S). Indexed samples were run using the Illumina MiSeq V3 600-cycle kit (MS-102-  
168 3003). CUT&RUN raw reads were mapped to genome hg19. by bowtie 2.3.4 with default  
169 parameter. Then mapping file were converse to .bw file by bamCoverage (15, 16).

170

## 171 **Immunoblotting**

172 Cells were treated with RIPA buffer, then the lysates were subjected to SDS-PAGE  
173 (Thermo Fisher Scientific) and transferred to a PVDF membrane (Bio-Rad) in accordance  
174 with the manufacturer's protocols at a constant 100 V for 1 hour. After incubation with 5%  
175 nonfat milk in TBS-T (10 mM Tris, pH 8.0, 150 mM NaCl, 0.5% Tween-20) for 1 hour at  
176 room temperature, the membrane was incubated with antibodies against GAPDH  
177 (Thermo Fisher Scientific, AM4300, diluted 1:5,000), ARF (abcam, ab185620, diluted  
178 1:1,000), p16<sup>INK4A</sup> (abcam, ab189034, diluted 1:1,000), p-RB (Ser807/811, Cell Signaling,  
179 8516, diluted 1:1,000), p-RB (Ser780, Cell Signaling, 8180, diluted 1:1,000), RB (Cell  
180 Signaling, 9309, diluted 1:1,000) and YY1 antibody (Active Motif, 61779, diluted 1:1,000)  
181 at 4°C for 48 hours with gentle shaking. Membranes were washed three times for 30 min  
182 and incubated with a 1:2,000 dilution of horseradish peroxidase–conjugated secondary  
183 antibodies for 2 hours at room temperature. Blots were washed with TBS-T three times



184 for 30 mins and developed with the ECL system (Amersham Biosciences) in accordance  
185 with the manufacturer's instructions.

186

### 187 **Fluorescence *in situ* hybridization**

188 An 800-bp (homology arms removed) purified DNA (*P2A-mCherry*) sequence was labeled  
189 with a red-dUTP (AF594, Molecular Probes) by nick translation, and an *INK4/ARF* fosmid  
190 clone (WI2-2622K01/9p21.3) was labeled with a green-dUTP (AF488, Molecular Probes).  
191 Both labeled probes were combined with sheared human DNA and independently  
192 hybridized to fix the interphase and metaphase nuclei derived from each sample using  
193 routine cytogenetic methods in a solution containing 50% formamide, 10% dextran sulfate,  
194 and 2XSSC. The cells were then stained with DAPI and analyzed.

195

### 196 **Quantitative real-time PCR**

197 Total RNA was collected from 1 million cells of SEM or SK-N-SH by using TRIzol (Thermo  
198 Fisher Scientific, 15596026). Reverse transcription was performed using a High-Capacity  
199 cDNA Reverse Transcriptase Kit (Applied Biosystems, 4374966). Real-time PCR was  
200 performed using FAST SYBR Green Master Mix (Applied Biosystems, 4385612) in  
201 accordance with the manufacturer's instructions and primers to detect *p16<sup>INK4A</sup>*, *ARF*,  
202 *mCherry*, and *GAPDH*. Relative gene expression was determined by the  $\Delta\Delta$ -CT method  
203 (17). qRT-PCR primers were listed in *SI Appendix, Dataset S1*.

204

### 205 **Statistics**

206 All values are shown as the mean  $\pm$  SEM. Statistical analyses were performed with  
207 GraphPad Prism software, version 6.0. *P*-values were calculated by a two-tailed *t*-test.

208

## 209 **Abbreviations**

210 CRISPR, clustered regularly interspaced short palindromic repeats; DSB, DNA double-  
211 strand break; PAM, protospacer adjacent motif; INDEL, insertion and deletion; bp, base  
212 pair; ChIP, chromatin immunoprecipitation; TAD, topologically associated domain; TF,  
213 transcription factor; TSS, transcription start site.

214

215

## 216 **SI Appendix Figure Legends**

### 217 **Fig. S1 Functional validation of $p16^{INK4A-P2A-mCherry}$ allele by CRISPR interference** 218 **(CRISPRi)**

219 (A) The  $p16^{mCherry/+}$  reporter cell line was transduced with lentiviral dCas9-KRAB and  
220 either NT-sgRNA or  $p16^{INK4A}$ -sgRNA-1 that targeted against the  $p16^{INK4A}$  promoter.  
221 Flow cytometry analysis of mCherry fluorescence was demonstrated in  
222 comparison to NT-sgRNA targeted cells along with parental SEM cells.

223 (B) qRT-PCR was performed to quantify  $p16^{INK4A}$  mRNA expression in  
224  $p16^{mCherry/+;dCas9-KRAB}$  cells targeted with either NT-sgRNA or  $p16^{INK4A}$ -sgRNA-1  
225 (N=4).

226 (C) Immunoblotting was performed on  $p16^{mCherry/+;dCas9-KRAB}$  cells targeted with either  
227  $p16^{INK4A}$ -sgRNA-1 or NT-sgRNA by using antibodies against  $p16^{INK4A}$ , p-RB1, RB1  
228 and GAPDH.

229 (D) Cell number was counted at day 0, 1 and 3 on  $p16^{mCherry/+;dCas9-KRAB}$  cells targeted  
230 with either  $p16^{INK4A}$ -sgRNA-1 or NT-sgRNA.

231 **Fig. S2 Characterization of non-coding CRISPR sgRNA library by Deep-Sequencing**

232 (A) Maxiprep plasmid DNA containing the CRISPR sgRNA library designed against  
233 the entire *INK4/ARF* locus was amplified and sequenced by next-generation  
234 sequencing. Counts of each sgRNA were illustrated as  $\log_2$  ratio.

235 (B) Deep-sequencing and raw count analysis of the distribution of all sgRNAs 48 hours  
236 after library was infected into human IMR90 and HCT116 cells.

237 (C) Pearson's Correlation analysis of the distribution of all sgRNAs amplified from  
238 library-infected human IMR90 and HCT116 cells in comparison to maxiprep  
239 plasmid DNAs.

240 **Fig. S3 Optimization of the sorting gate of the  $p16^{INK4A-P2A-mCherry}$  population in non-**  
241 **coding CRISPR screening**

242 (A) Flow cytometry sorting was performed in CRISPR sgRNA library-targeted  
243  $p16^{mCherry/+;dCas9-KRAB}$  cells for  $mCherry^{High}$  and  $mCherry^{Low}$  populations, which were  
244 gated at the top and bottom of 5%, 10%, 12%, and 15% sorting gates.

245 (B) The number of sgRNAs that were enriched in the positive-control locus ( $p16^{INK4A}$   
246 promoter) in each sort was calculated and compared to the total sgRNAs in these  
247 regions to determine the enrichment percentage.

248 (C) Pearson's Correlation of the global sgRNA distribution was calculated among the  
249 5%, 10%, 12% and 15% sort experiments.

250 **Fig. S4 Enriched sgRNAs in CRISPR/dCas9-KRAB screenings**

251 (A) Volcano plot illustration of CRISPR/Cas9 screening result in combination with  
252 arrayed sgRNAs spanning the ATAC-seq and H3K27ac peaks in the *INK4/ARF*  
253 locus. The distribution of each sgRNA in the top 10% and bottom 10% of the  
254 mCherry sorted population was calculated for a given fold change of  
255  $\log_2(\text{High/Low})$  (x-axis) and *P*-value (y-axis). Each screening was performed three  
256 times to calculate the *P*-value. Under the cut-off of an adjusted *P*-value of  $\leq 0.01$   
257 and a fold-change of  $\log_2^{\text{High/Low}} \geq 1$  or  $\leq -1$ , purple dots represent sgRNAs  
258 designed to target the *p16<sup>INK4A</sup>* promoter. Red dots represent the non-targeting  
259 negative-control sgRNAs. Green dots indicate sgRNAs enriched in the *ARF*  
260 promoter. Pink dots indicate sgRNAs enriched in the *p15<sup>INK4B</sup>* promoter.

261 (B) Volcano plot demonstration of CRISPR/dCas9-KRAB screening result in  
262 combination with arrayed sgRNAs spanning the ATAC-seq/H3K27ac peaks in the  
263 *INK4/ARF* locus.

264 (C) Volcano plot demonstration of the results of no effector screening in combination  
265 with arrayed sgRNAs spanning the ATAC-seq/H3K27ac peaks in the *INK4/ARF*  
266 locus.

267 (D) The distribution of sgRNAs in selected viewpoints at *INK4/ARF* locus and a distal  
268 non-coding region in three screenings using dCas9-KRAB, Cas9, and no effector  
269 control.

270

271 **Fig. S5 Distribution of the full array of sgRNAs from dCas9-KRAB and Cas9**  
272 **screening.** All of the 2029 sgRNAs represented in the screening were plotted to genome  
273 browser based on enrichment score between mCherry<sup>High</sup> and mCherry<sup>Low</sup>.

274

275 **Fig. S6 Distal repressive elements residing 3' and adjacent to the *ARF* promoter**  
276 **contribute to the repression of *p16<sup>INK4A</sup>***

277 (A) The physical location of all four sgRNAs targeting the *p16<sup>INK4A</sup>* repressive element  
278 adjacent to the *ARF* promoter (*ARF*-sgRNA-1, 2, 3 and 4).

279 (B) Validation of four randomly selected sgRNAs targeting the *p16<sup>INK4A</sup>* promoter  
280 (*p16<sup>INK4A</sup>*-sgRNA-1, 2, 3 and 4) and two sgRNAs targeting the *ARF* promoter (*ARF*-  
281 sgRNA-1 and 2) outside the 42-bp core sequence. Lentiviral sgRNA infection into  
282 *p16<sup>mCherry/+;dCas9-KRAB</sup>* cells was performed, followed by flow cytometry analysis of  
283 the mCherry density. The *p*-values were calculated by a two-tailed *t*-test.

284 **Fig. S7 Acute depletion of CTCF in SEM cells by auxin-inducible degron (AID)**  
285 **system did not affect expression of *p16<sup>INK4A</sup>***

286 (A) ChIP-seq tracks of CTCF, SMC3 and YY1 on the *INK4/ARF* locus based on  
287 ENCODE data from GM12878 and SK-N-SH cells.

288 (B) Schematic illustration of working mechanism of auxin-inducible degron system.

289 (C) Schematic diagram of donor vector design for miniAID-mClover3 knock-in to C-  
290 terminus of human *CTCF* before the stop codon. HA: homology arm. Single-guide  
291 RNA (sgRNA) and PAM sequences were added to each end of the HA.

292 (D) A Bi-allelic knock-in clone and a mono-allelic knock-in clone were used to detect  
293 protein degradation after IAA treatment for 24 hours. The CTCF-miniAID-mClover3  
294 fusion protein was 35 KD larger than endogenous CTCF. GAPDH was included as  
295 loading control.

296 (E) CUT&RUN of CTCF was conducted in SEM<sup>CTCF-AID</sup> knockin cells (clones 35 and  
297 42) treated with or without IAA for 48 hours. A representative set of consistent data  
298 from one clone (clone 42) was shown. Tracks were shown at the viewpoint of  
299 *INK4/ARF* locus.

300 (F) qRT-PCR analysis of *p16<sup>INK4A</sup>* was conducted in three bi-allelic knock-in clones in  
301 response to CTCF depletion.

302 (G) Immunoblotting was performed using antibody against p16<sup>INK4A</sup> in four individual  
303 bi-allelic knock-in clones in response to CTCF depletion.

304

## 305 REFERENCES

- 306 1. Vo BT, *et al.* (2017) Inactivation of Ezh2 Upregulates Gfi1 and Drives Aggressive Myc-  
307 Driven Group 3 Medulloblastoma. *Cell Rep* 18(12):2907-2917.
- 308 2. Wang T, *et al.* (2015) Identification and characterization of essential genes in the human  
309 genome. *Science* 350(6264):1096-1101.
- 310 3. Doench JG, *et al.* (2016) Optimized sgRNA design to maximize activity and minimize off-  
311 target effects of CRISPR-Cas9. *Nat Biotechnol* 34(2):184-191.
- 312 4. Sanjana NE, Shalem O, & Zhang F (2014) Improved vectors and genome-wide libraries  
313 for CRISPR screening. *Nat Methods* 11(8):783-784.
- 314 5. Ma H, *et al.* (2015) A CRISPR-Based Screen Identifies Genes Essential for West-Nile-  
315 Virus-Induced Cell Death. *Cell Rep* 12(4):673-683.
- 316 6. Tzelepis K, *et al.* (2016) A CRISPR Dropout Screen Identifies Genetic Vulnerabilities and  
317 Therapeutic Targets in Acute Myeloid Leukemia. *Cell Rep* 17(4):1193-1205.
- 318 7. Hart T, *et al.* (2015) High-Resolution CRISPR Screens Reveal Fitness Genes and  
319 Genotype-Specific Cancer Liabilities. *Cell* 163(6):1515-1526.
- 320 8. Hart T, *et al.* (2017) Evaluation and Design of Genome-Wide CRISPR/SpCas9 Knockout  
321 Screens. *G3 (Bethesda)* 7(8):2719-2727.
- 322 9. Smith JR, *et al.* (2008) Robust, persistent transgene expression in human embryonic  
323 stem cells is achieved with AAVS1-targeted integration. *Stem Cells* 26(2):496-504.
- 324 10. Park RJ, *et al.* (2017) A genome-wide CRISPR screen identifies a restricted set of HIV host  
325 dependency factors. *Nat Genet* 49(2):193-203.
- 326 11. Love MI, Huber W, & Anders S (2014) Moderated estimation of fold change and  
327 dispersion for RNA-seq data with DESeq2. *Genome Biol* 15(12):550.
- 328 12. Li W, *et al.* (2014) MAGeCK enables robust identification of essential genes from  
329 genome-scale CRISPR/Cas9 knockout screens. *Genome Biol* 15(12):554.

- 330 13. Davies JO, *et al.* (2016) Multiplexed analysis of chromosome conformation at vastly  
331 improved sensitivity. *Nat Methods* 13(1):74-80.
- 332 14. Kent WJ, Zweig AS, Barber G, Hinrichs AS, & Karolchik D (2010) BigWig and BigBed:  
333 enabling browsing of large distributed datasets. *Bioinformatics* 26(17):2204-2207.
- 334 15. Langmead B & Salzberg SL (2012) Fast gapped-read alignment with Bowtie 2. *Nat*  
335 *Methods* 9(4):357-359.
- 336 16. Ramirez F, Dundar F, Diehl S, Gruning BA, & Manke T (2014) deepTools: a flexible  
337 platform for exploring deep-sequencing data. *Nucleic Acids Res* 42(Web Server  
338 issue):W187-191.
- 339 17. Schmittgen TD & Livak KJ (2008) Analyzing real-time PCR data by the comparative C(T)  
340 method. *Nat Protoc* 3(6):1101-1108.
- 341

Figure S1

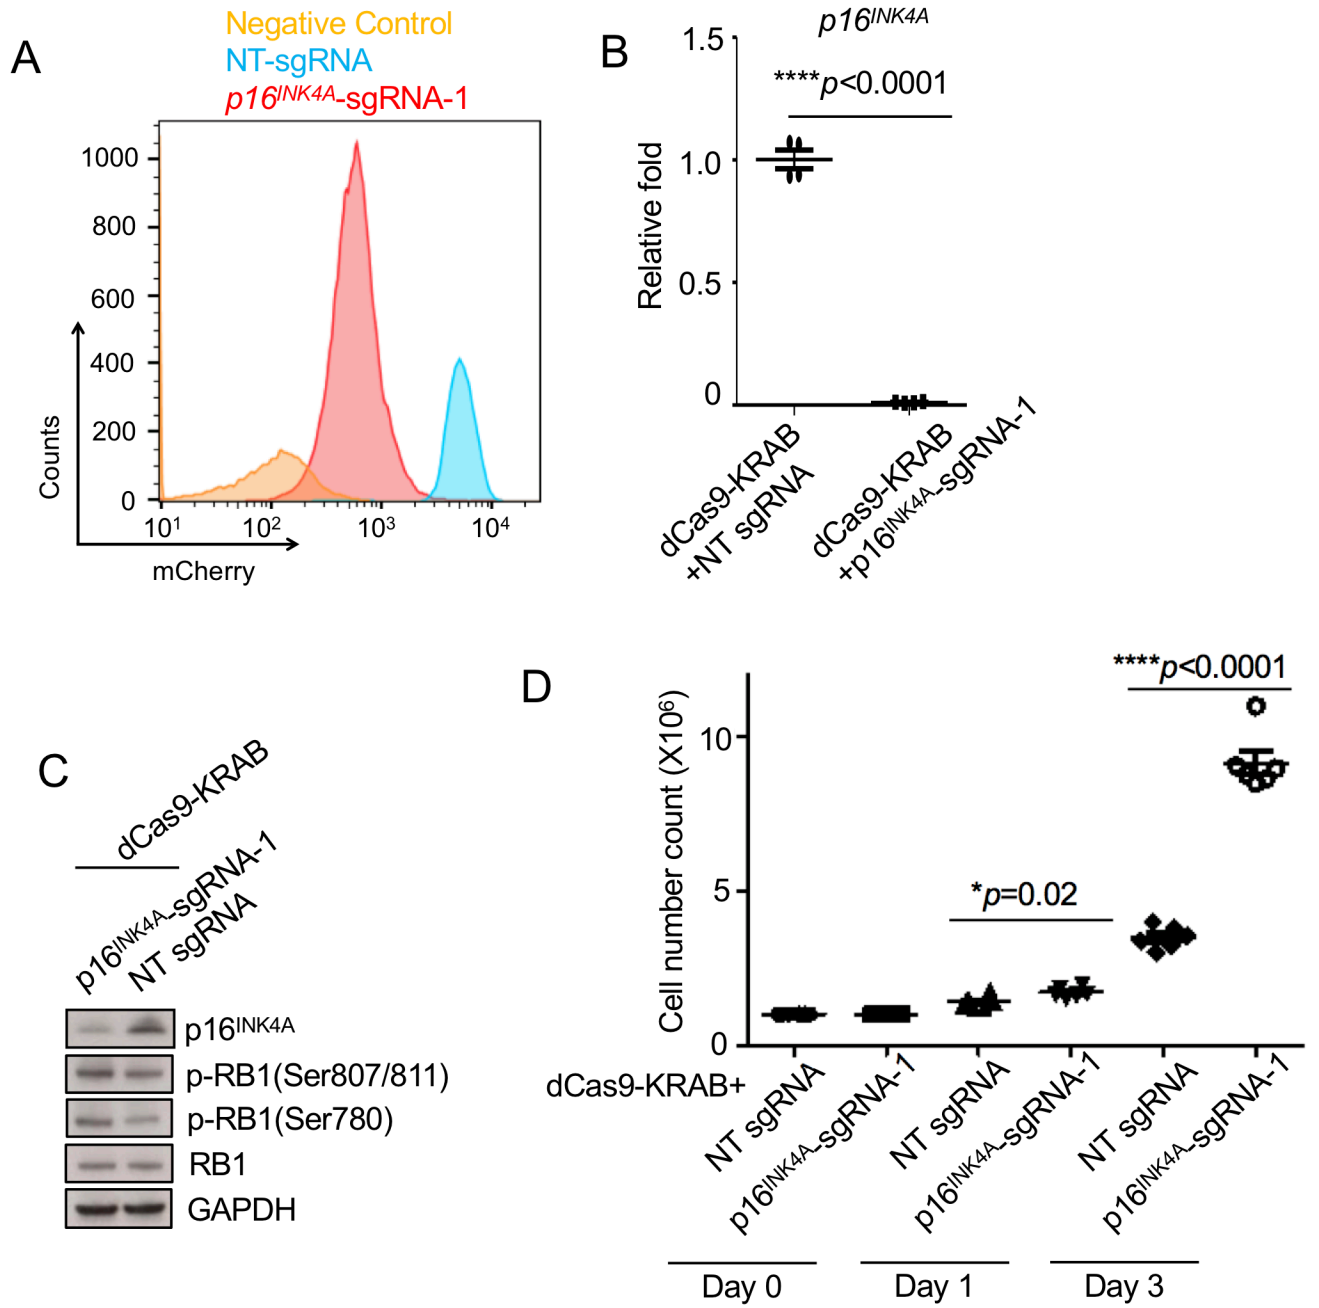



Figure S2

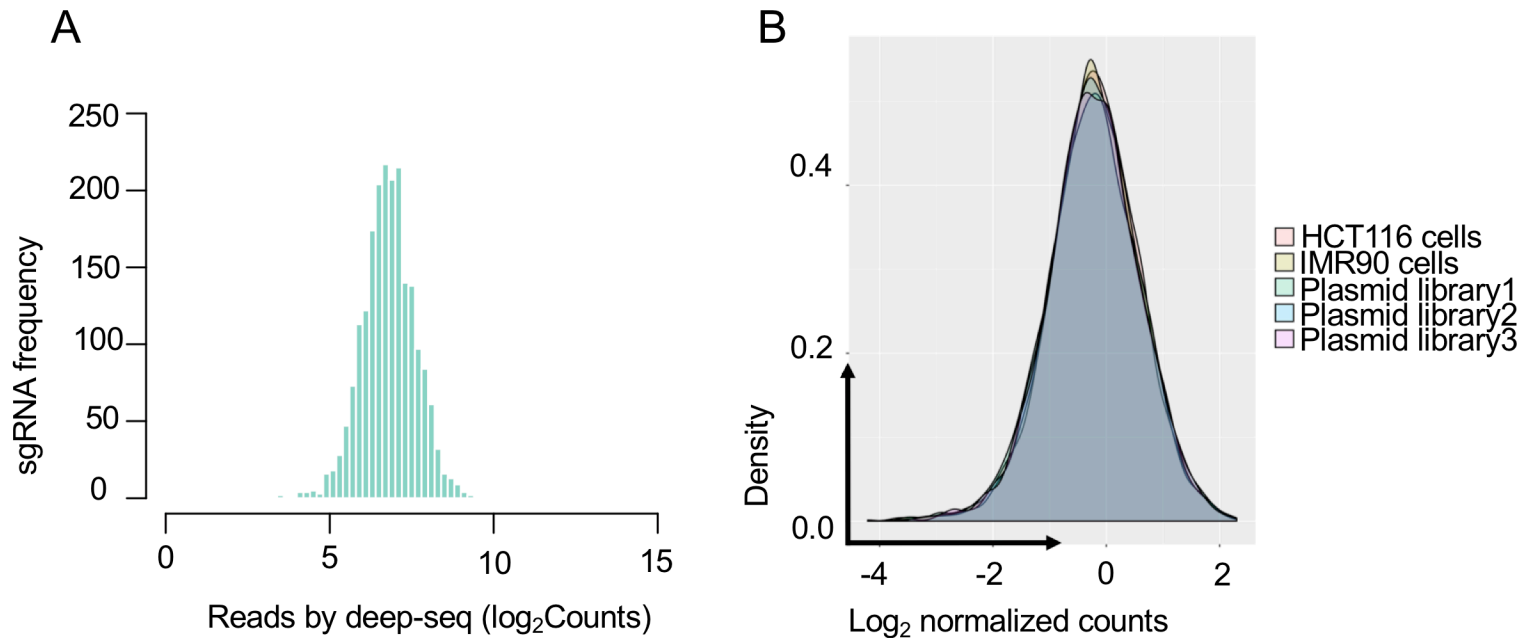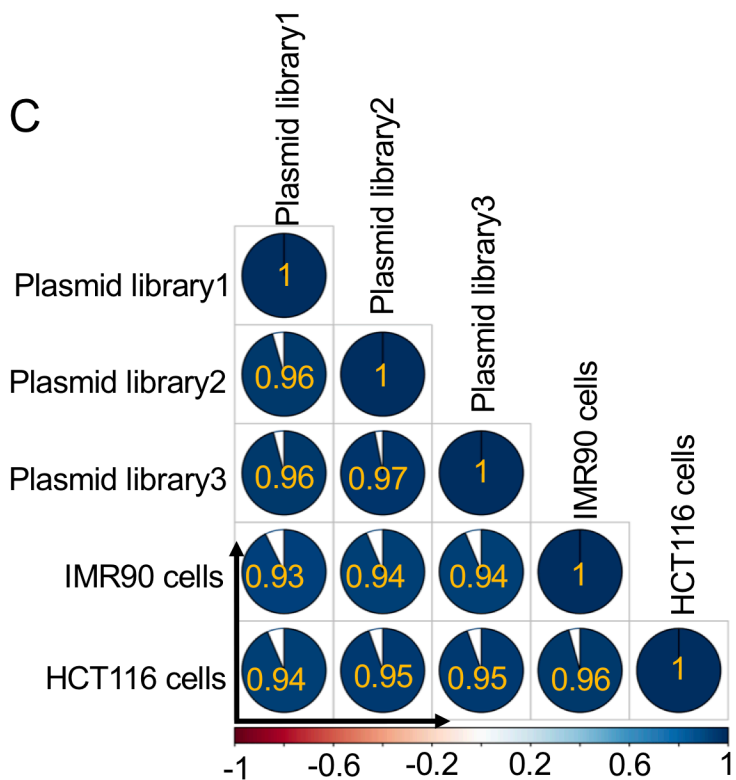

Figure S3

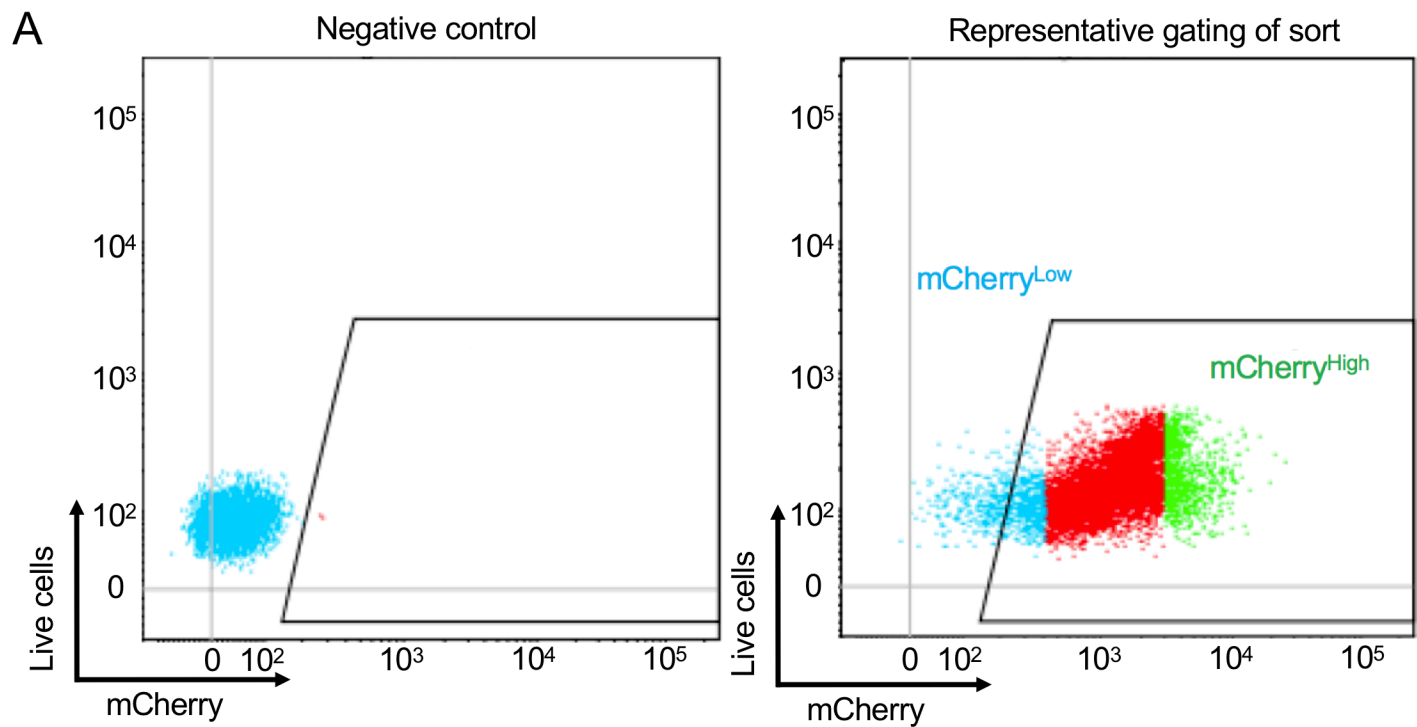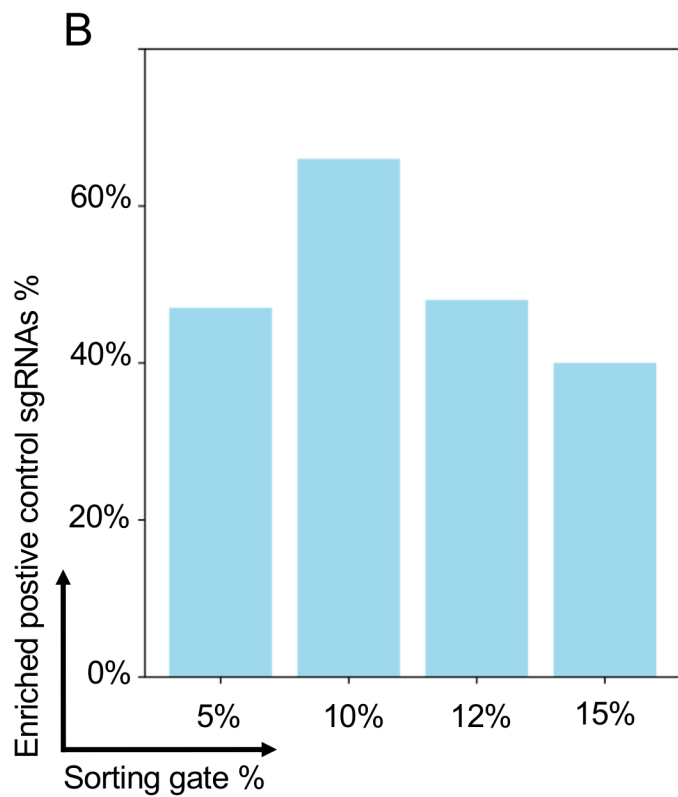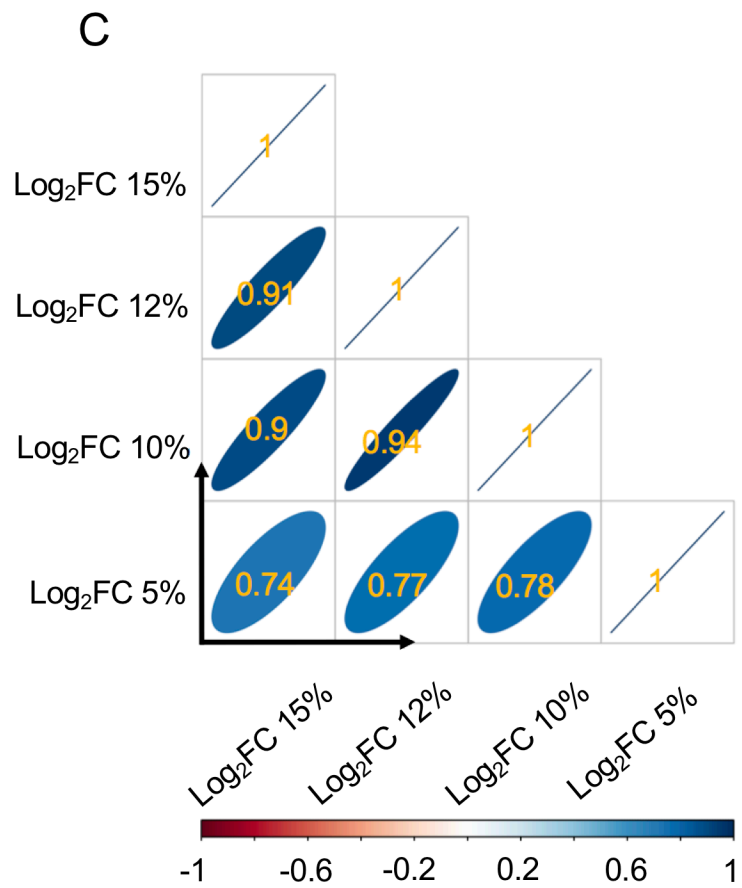

Figure S4

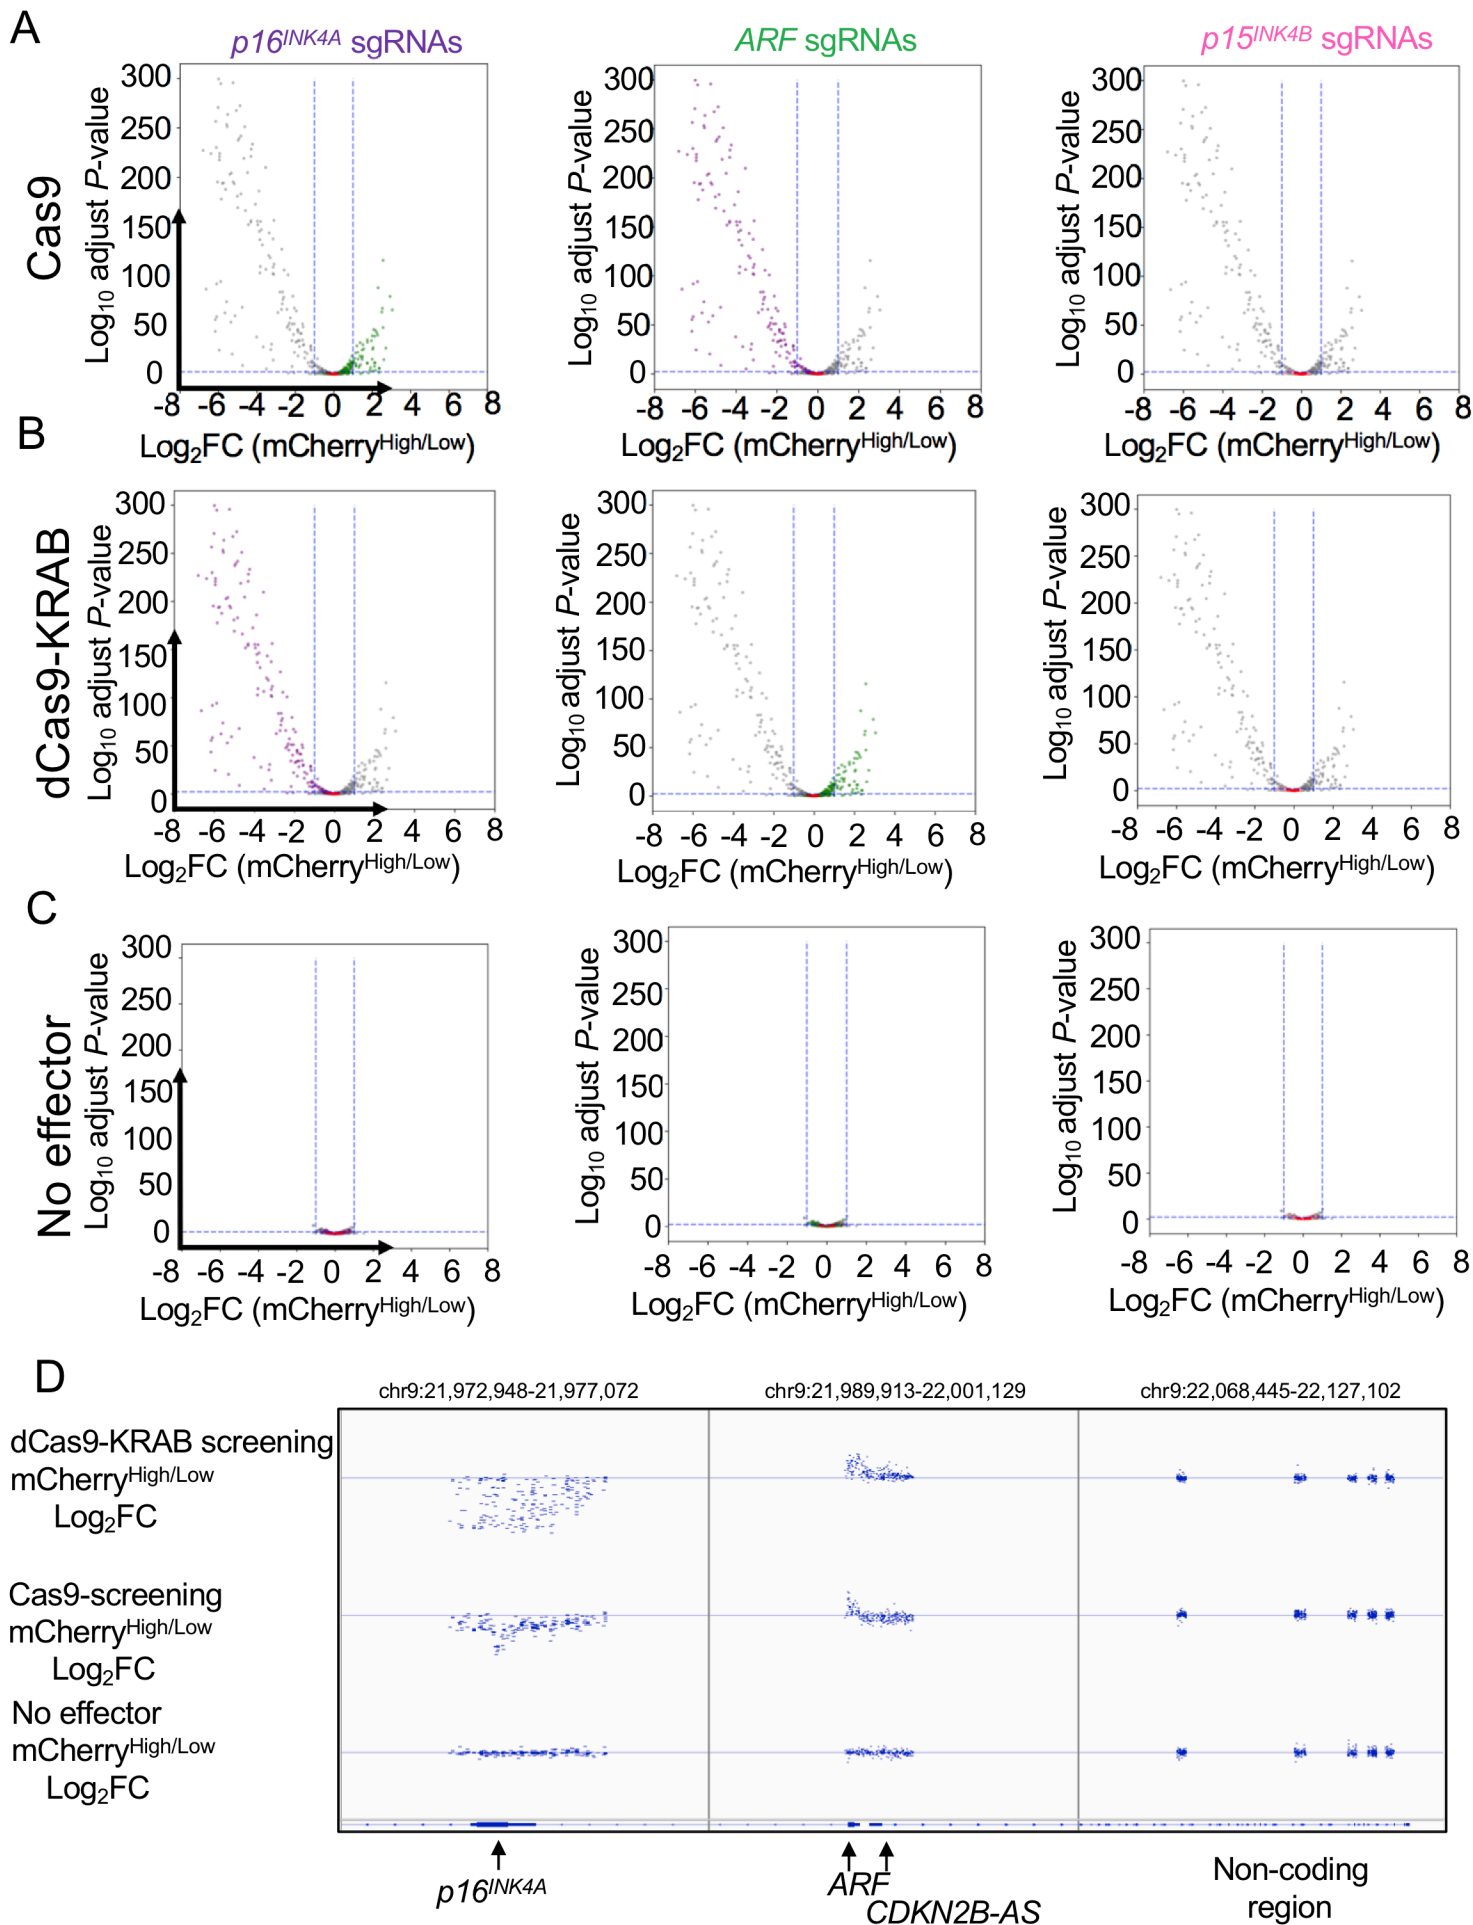



Figure S6

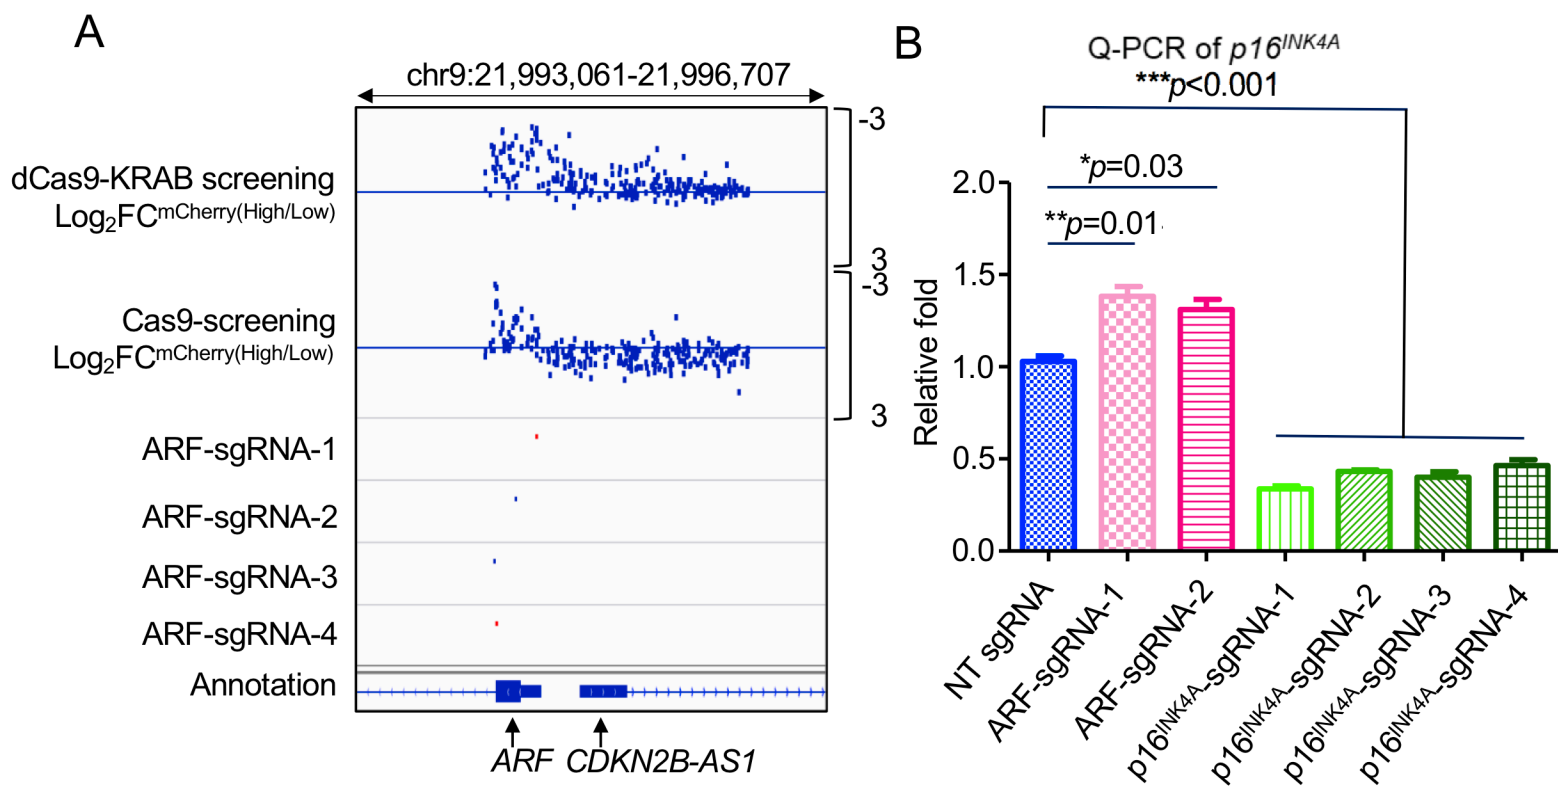

Figure S7

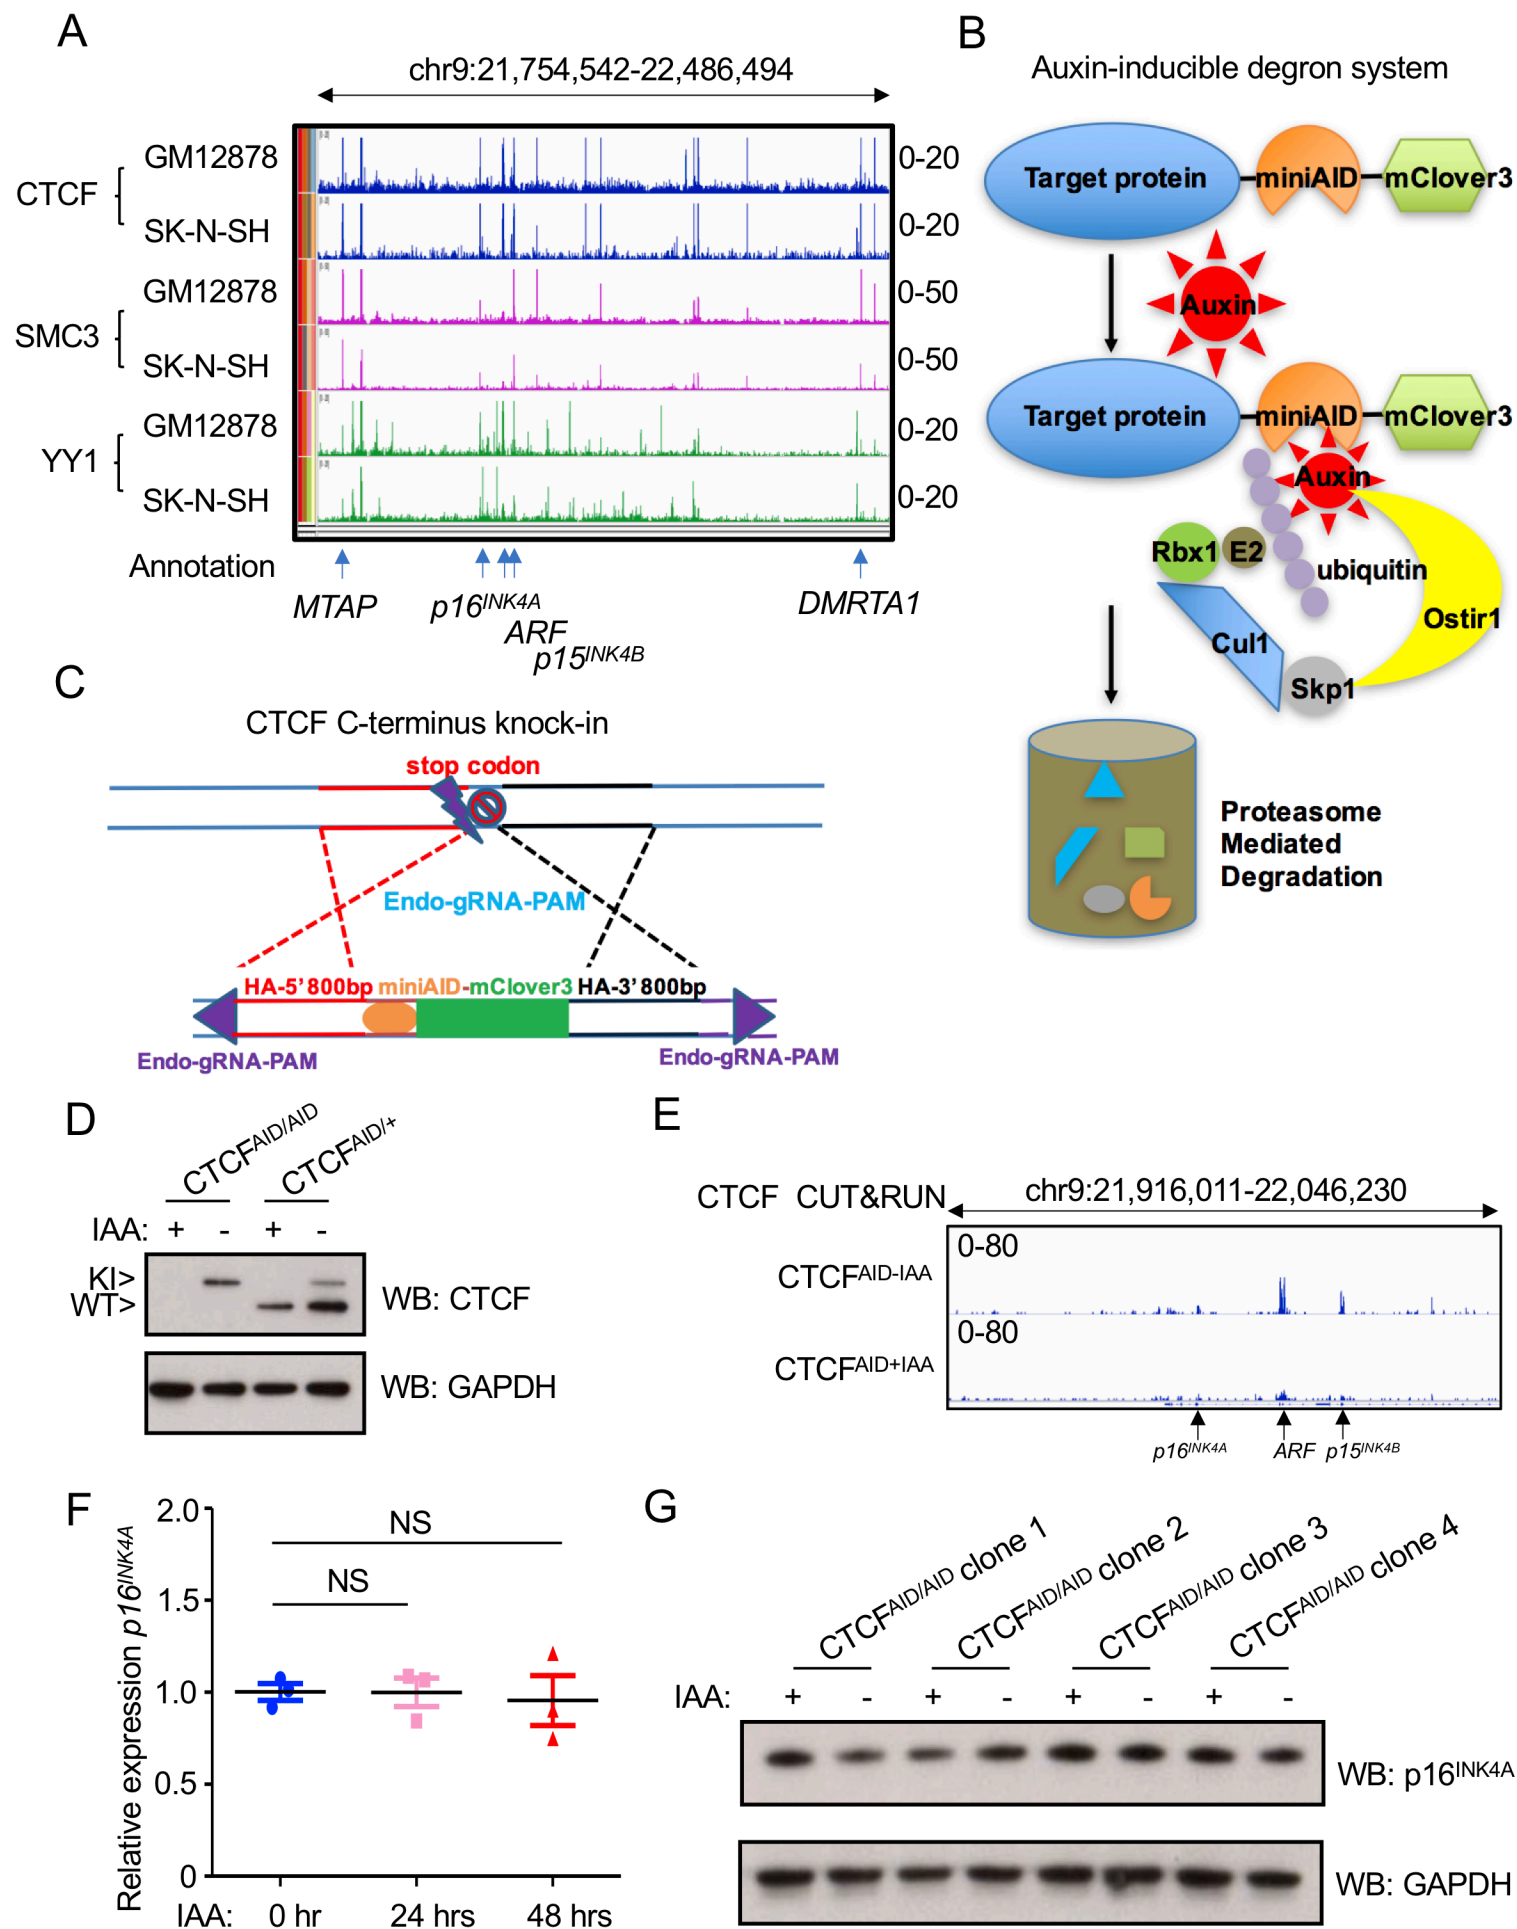

Supplement: pnas.1909720116.sapp.pdf [file pnas.1909720116.sapp.pdf]
